# Supplementary material
Source: publisher figshare collection journal article supplement (https://sage.figshare.com/ndownloader/files/17461721)
Supplement: Supplementary file 1 [file 17461721]

Reviewer 1 v.1

Comments to the author:

Interesting manuscript

Considering that a real life study has been made. I suggest to describe better the strength of the study as well as the limitations ( compared to previously published studies )
